# Supplementary material for: How the Crosslinker Amount Influences the Final Properties of Hydroxyethyl Methacrylate Cryogels
Source: MDPI journal article supplement (doi:10.3390/gels10030163), 2024-02-22
Supplement: s1 [file s1]

## **\_bSupporting information**

# **How the crosslinker amount influences the final properties of HEMA Cryogels.**

**Giuseppe Proietto Salanitri<sup>\*1,2</sup>, Enrica Luzzi<sup>3</sup>, Daniele Caretti<sup>2</sup>, Tommaso Mecca<sup>4</sup>, Sabrina C. Carroccio<sup>1</sup>, and Andrea A. Scamporrino<sup>1</sup>**

<sup>1</sup> CNR-Institute for Polymers, Composites and Biomaterials, Via Paolo Gaifami 18, 95126 Catania, Italy; sabrinacarola.carroccio@cnr.it (S.C.C.); andreaantonio.scamporrino@cnr.it (A.A.S.)

<sup>2</sup> Department of Industrial Chemistry "Toso Montanari", University of Bologna, Viale Risorgimento 4, 40136 Bologna, Italy; daniele.caretti@unibo.it

<sup>3</sup> Department of Chemical Engineering, Materials and Industrial Production, University of Naples Federico II, DICMaPI-P. le Tecchio 80, 80125 Naples, Italy; enrica.luzzi@unina.it

<sup>4</sup> CNR-ICB, Via Paolo Gaifami 18, 95126 Catania, Italy; tommaso.mecca@icb.cnr.it

\* Correspondence: giuseppe.proietto3@unibo.it

**Table S1.** Cryogel's washing parameters

| <b>CYCLE N°</b>                                       | <b>WASHING SOLUTION</b>           | <b>METHOD</b>        |
|-------------------------------------------------------|-----------------------------------|----------------------|
| 1 <sup>st</sup>                                       | 33 mL H <sub>2</sub> O            | Directed percolation |
| 2 <sup>nd</sup>                                       | 33 mL H <sub>2</sub> O-EtOH 50:50 | Directed percolation |
| 3 <sup>rd</sup> – 4 <sup>th</sup>                     | H <sub>2</sub> O-EtOH 25:75       | Immersion            |
| 5 <sup>th</sup> - 6 <sup>th</sup> - 7 <sup>th</sup>   | EtOH                              | Immersion            |
| 8 <sup>th</sup>                                       | EtOH- Et <sub>2</sub> O 50:50     | Immersion            |
| 9 <sup>th</sup> – 10 <sup>th</sup> – 11 <sup>th</sup> | Et <sub>2</sub> O                 | Immersion            |

**Table S2.** Average pore properties calculated on 5 images for each cryogel samples: (A) 1:5; (B) 1:6; (C) 1:7.

| SAMPLE                | A                    |                          | B                   |                          | C                   |                          |
|-----------------------|----------------------|--------------------------|---------------------|--------------------------|---------------------|--------------------------|
| Pore Tot. Number      | 393                  |                          | 238                 |                          | 168                 |                          |
| Av Pore Area Ratio    | 39,34%               |                          | 31,10%              |                          | 46,12               |                          |
|                       | Median               | Average                  | Median              | Average                  | Median              | Average                  |
| Circle eq. diameter   | 9.09 $\mu\text{m}$   | 12.8 $\mu\text{m}$       | 11.8 $\mu\text{m}$  | 14.5 $\mu\text{m}$       | 12.3 $\mu\text{m}$  | 17.4 $\mu\text{m}$       |
| Major axis            | 12.3 $\mu\text{m}$   | 18.4 $\mu\text{m}$       | 16.4 $\mu\text{m}$  | 20.7 $\mu\text{m}$       | 18.7 $\mu\text{m}$  | 25.5 $\mu\text{m}$       |
| Minor axis            | 6.53 $\mu\text{m}$   | 9.36 $\mu\text{m}$       | 8.01 $\mu\text{m}$  | 10.7 $\mu\text{m}$       | 8.49 $\mu\text{m}$  | 12.7 $\mu\text{m}$       |
| Circumference         | 31.7 $\mu\text{m}$   | 48.4 $\mu\text{m}$       | 41.1 $\mu\text{m}$  | 54.2 $\mu\text{m}$       | 46.4 $\mu\text{m}$  | 73.9 $\mu\text{m}$       |
| Convex hull           | 31.7 $\mu\text{m}$   | 45.2 $\mu\text{m}$       | 39.8 $\mu\text{m}$  | 50.8 $\mu\text{m}$       | 45.4 $\mu\text{m}$  | 66.1 $\mu\text{m}$       |
| Circum. circle diam.  | 12.7 $\mu\text{m}$   | 18.6 $\mu\text{m}$       | 16.2 $\mu\text{m}$  | 20.9 $\mu\text{m}$       | 18.9 $\mu\text{m}$  | 27.2 $\mu\text{m}$       |
| Area                  | 64.9 $\mu\text{m}^2$ | 200 $\mu\text{m}^2$      | 110 $\mu\text{m}^2$ | 238 $\mu\text{m}^2$      | 118 $\mu\text{m}^2$ | 406 $\mu\text{m}^2$      |
| Volume by area        | 394 $\mu\text{m}^3$  | 3.82E+03 $\mu\text{m}^3$ | 868 $\mu\text{m}^3$ | 4.44E+03 $\mu\text{m}^3$ | 965 $\mu\text{m}^3$ | 1.21E+04 $\mu\text{m}^3$ |
| Pixel count           | 340                  | 1049                     | 576                 | 1247                     | 618                 | 2126                     |
| Aspect ratio          | 0.581                | 0.573                    | 0.588               | 0.574                    | 0.57                | 0.561                    |
| Circularity           | 0.798                | 0.777                    | 0.814               | 0.77                     | 0.742               | 0.719                    |
| Convexity             | 1                    | 0.974                    | 1                   | 0.972                    | 0.989               | 0.956                    |
| Elongation            | 0.419                | 0.427                    | 0.412               | 0.426                    | 0.43                | 0.439                    |
| Grayscale             | 183                  | 183                      | 175                 | 175                      | 187                 | 187                      |
| Inscrib. circle diam. | 6.21 $\mu\text{m}$   | 9.02 $\mu\text{m}$       | 8.18 $\mu\text{m}$  | 9.94 $\mu\text{m}$       | 8.07 $\mu\text{m}$  | 11.3 $\mu\text{m}$       |

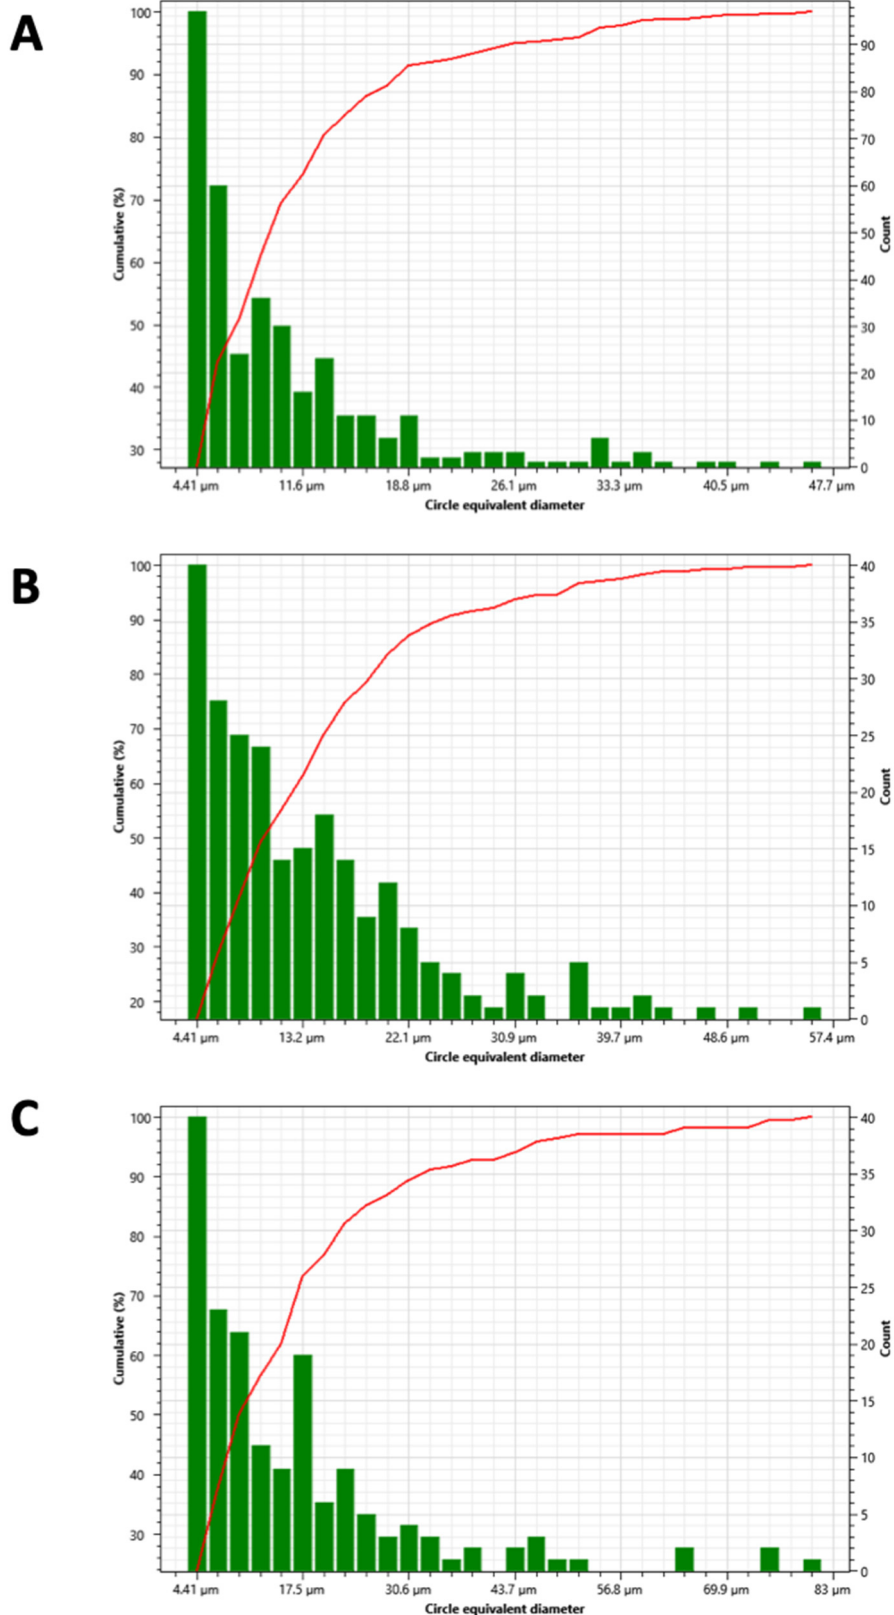

**Figure S1.** Cumulative % of pore distribution related to for each cryogel samples: (A) 1:5; (B) 1:6; (C) 1:7 calculated by using Phenom Porometric 1.1.2.0 (Phenom-World BV, Eindhoven, The Netherlands).

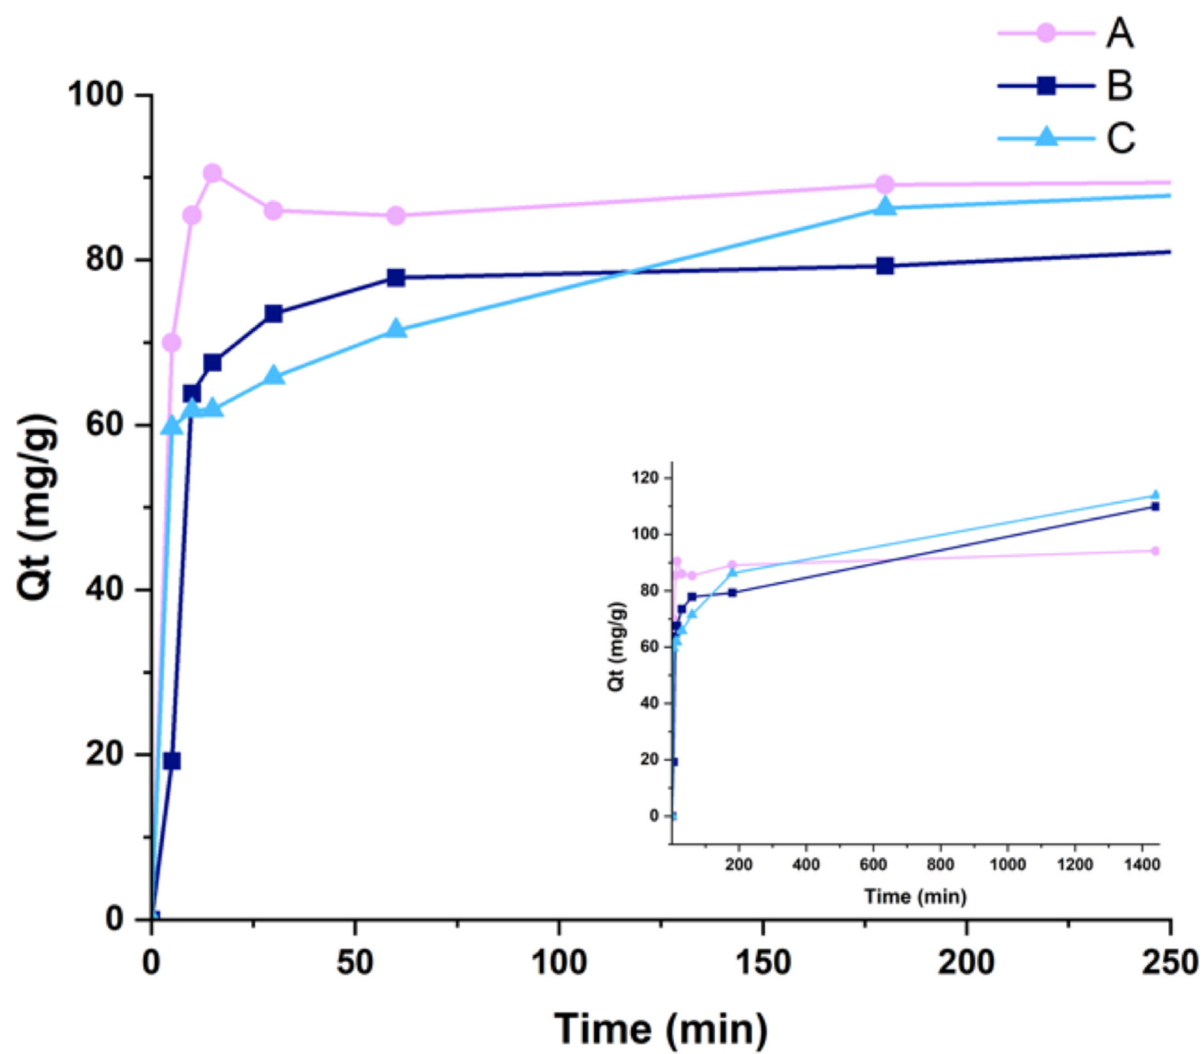

Figure S2. Variation of MV adsorption values as a function of time of the three synthesized samples.

|                         |                         |
|-------------------------|-------------------------|
| Equation                | $Y = a + b * x$         |
| Plot                    | C                       |
| Weight                  | No Weighting            |
| Intercept               | $-7,03168E-4 \pm 0,004$ |
| Slope                   | $0,12849 \pm 6,45411E$  |
| Residual Sum of Squares | $2,72323E-5$            |
| Pearson's r             | 0,99997                 |
| R-Square (COD)          | 0,99995                 |
| Adj. R-Square           | 0,99992                 |

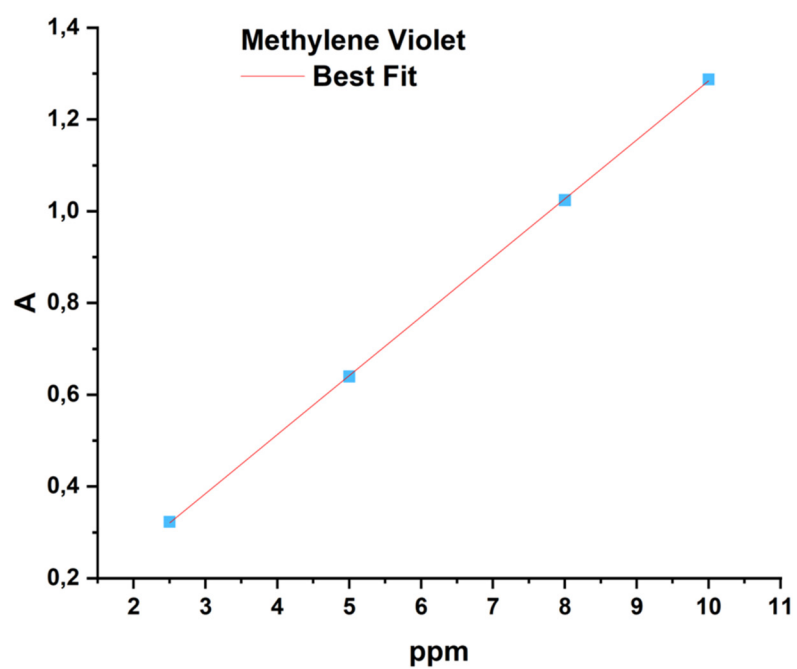

**Figure S3. Calibration curve**

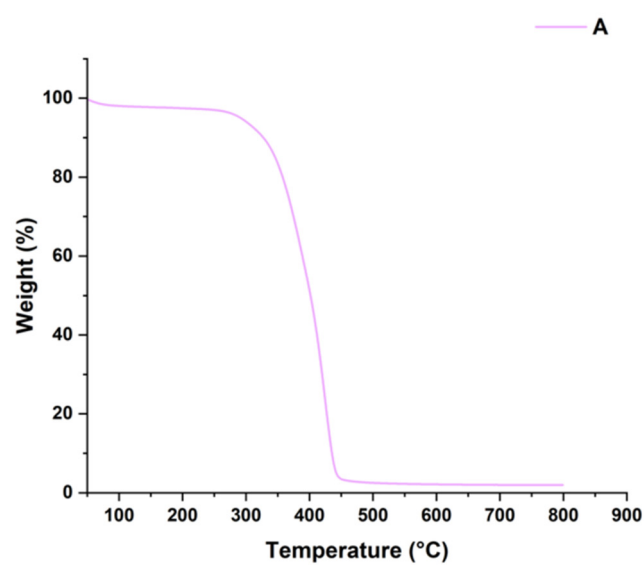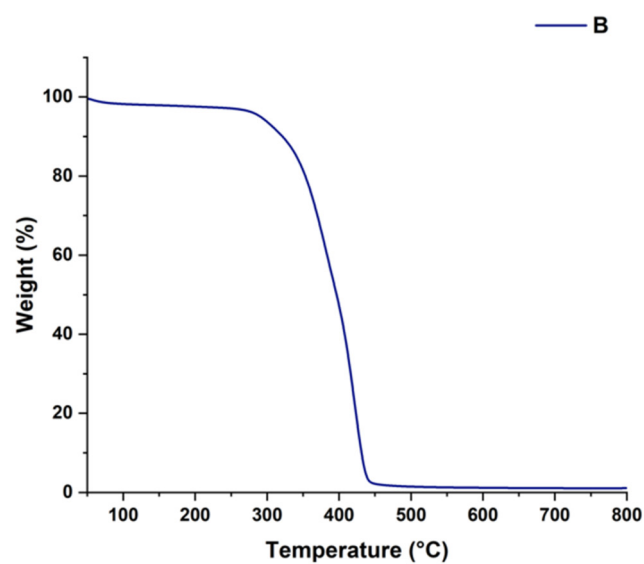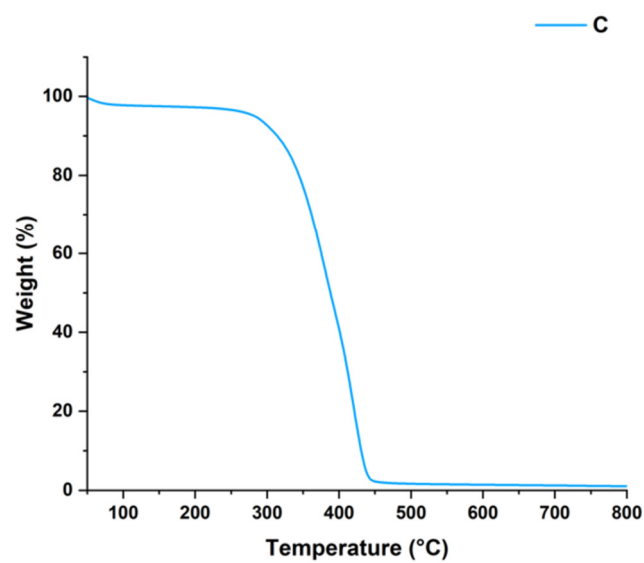

Figure S4. Thermograms of samples A, B, and C.

**Table S3.** Parameters obtained by applying Langmuir and Freundlich for the three synthesized cryogels.

|   | Langmuir Model Parameters |        |         |        |
|---|---------------------------|--------|---------|--------|
|   | * $Q_m$<br>(mg/g)         | $K_L$  | $R_L$   | $R^2$  |
| A | 94                        | 20,2   | 0.00009 | 0.9624 |
| B | 110                       | 0.0308 | 0.0556  | 0.9529 |
| C | 114                       | 0.0327 | 0.0494  | 0.9616 |

\* Maximum adsorption capacity

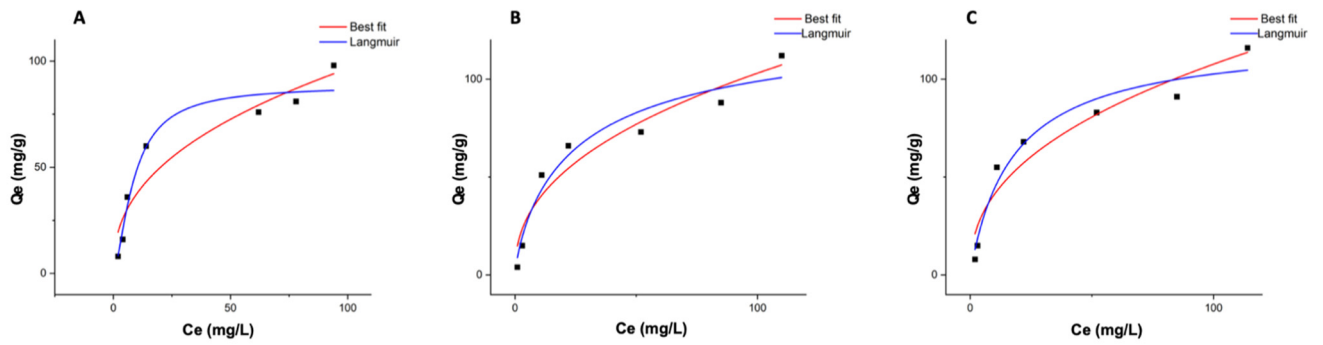

**Figure S5.** Equilibrium MV adsorption isotherms by plotting  $Q_e$  versus  $C_e$  experimental data for the three synthesized cryogels.

Langmuir model is described by Equation S1, where  $q_e$  (expressed in mg/g) represents the amount of methylene violet adsorbed,  $C_e$  (mg/L) is the concentration at the equilibrium,  $Q_0$  (mg/g) is the monolayer capacity, and  $b$  (mg/L) represents a constant whose value is related to the heat of adsorption ( $K_L$ ).

$$\text{Eq. S1:} \quad q_e = \frac{Q_0 b C_e}{1 + b C_e}$$

The following Equation S2, may be used to determine the separation factor ( $R_L$ ), related to the adsorption process' efficiency, from  $K_L$  value

$$\text{Eq. S2:} \quad R_L = \frac{1}{1 + K_L C_0}$$
